# Supplementary material for: Amyloid pathology arrangements in Alzheimer’s disease brains modulate in vivo seeding capability
Source: PubMed Central journal article supplement (PMC8008576; doi:10.1186/s40478-021-01155-0), 2021-03-30

**Supplemental Table 1.** Incidence of vascular amyloidosis in the hippocampus of APP/PS1 mice treated with AD and control brain extracts.

| Inoculum | Incidence of vascular amyloidosis (% affected mice) |
|----------|-----------------------------------------------------|
| 60129    | 0%                                                  |
| 60068    | 0%                                                  |
| 60649    | 17%                                                 |
| 51486    | 33%                                                 |
| 58652    | 0%                                                  |

# Supplemental Figure 1

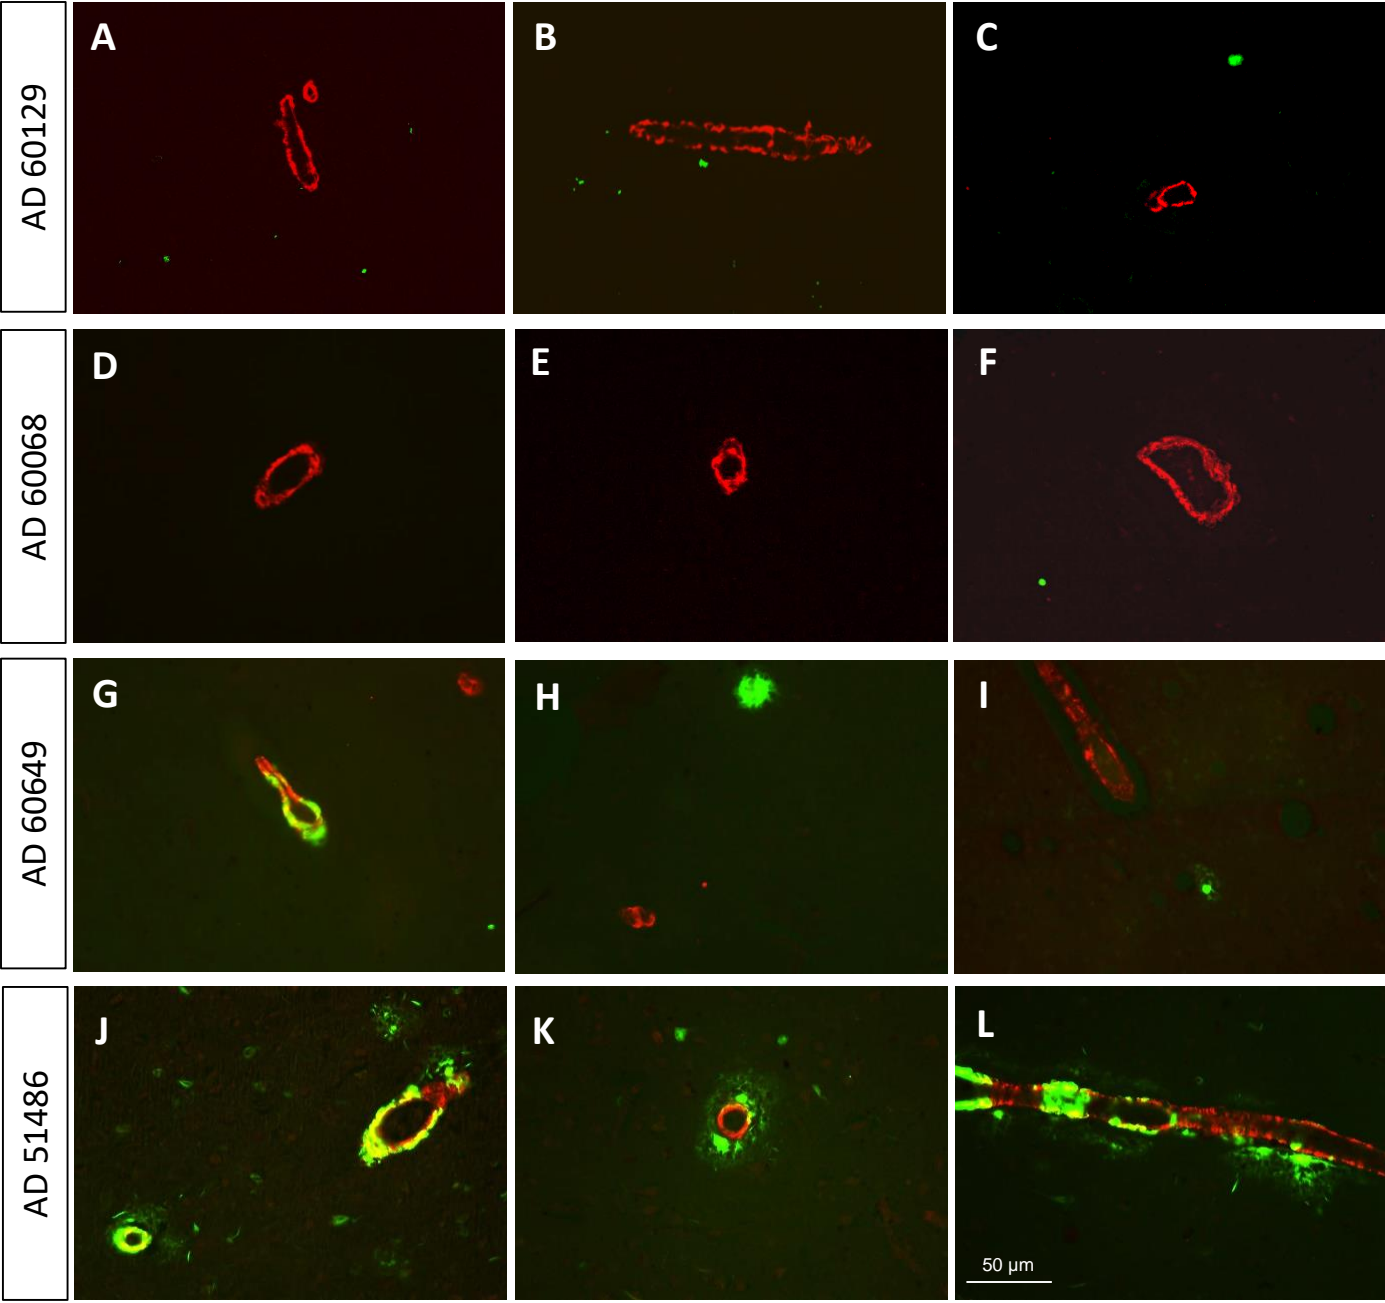

Supplement: 40478_2021_1155_MOESM1_ESM.pdf [file 40478_2021_1155_MOESM1_ESM.pdf]
