# Supplementary material for: Amyloid pathology arrangements in Alzheimer’s disease brains modulate in vivo seeding capability
Source: PubMed Central journal article supplement (PMC8008576; doi:10.1186/s40478-021-01155-0), 2021-03-30
Supplement: 40478_2021_1155_MOESM2_ESM.pdf [file 40478_2021_1155_MOESM2_ESM.pdf]

## **SUPPLEMENTAL FIGURE LEGENDS**

**Supplemental Figure 1. Vascular A $\beta$  deposition in brain tissue from AD patients.** Double staining with ThS (green) and anti-SMA antibody (red) confirm the absence of vascular A $\beta$  deposits in brain samples from patients AD60129 (A-C) and AD60068 (G-I). Vascular A $\beta$  was rare in sample AD60649 (G-I) (a single event in all brain slices analyzed) and abundant in patient AD51486 (J-L). Scale bar in L depicts 50  $\mu$ m and applies to all panels.
